# Supplementary material for: Stratospheric aerosol formed by intense volcanism–sea interaction during the 2022 Hunga Ha'apai eruption
Source: Copernicus journal article supplement (doi:10.5194/acp-25-10677-2025), 2025-09-17
Supplement: Supplementary file 1 [file acp-25-10677-2025-supplement.pdf]

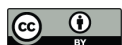

*Supplement of*

## **Stratospheric aerosol formed by intense volcanism–sea interaction during the 2022 Hunga Ha’apai eruption**

**Bengt G. Martinsson et al.**

*Correspondence to:* Bengt G. Martinsson ([bengt.martinsson@fysik.lu.se](mailto:bengt.martinsson@fysik.lu.se))

The copyright of individual parts of the supplement might differ from the article licence.

## 1 Supplementary Figures

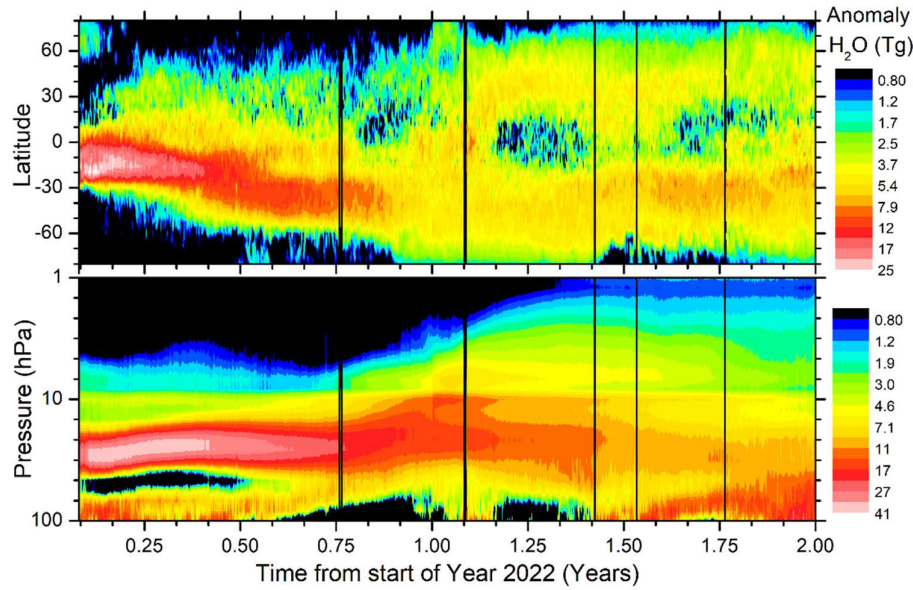

2  
3 **Figure S1.** Distributions of water vapor ( $H_2O$ ) in the stratosphere after the 2022 Hunga Tonga volcanic eruption.  
4 a) Latitude and b) altitude distributions of  $H_2O$  anomaly. The integration element sizes in a) span 1 – 100 hPa,  
5  $4^\circ$  in latitude and  $360^\circ$  in longitude, and in b)  $-82$  to  $82^\circ$  in latitude,  $360^\circ$  in longitude and atmospheric pressure  
6 ratio 1.21 ( $\sim 1.32 \pm 0.1$  km). The minor vertical tick marks show five of the eleven measurement levels inside a  
7 decade (1.5, 2.2, 3.2, 4.6 and 6.8 hPa respectively, and 10 times these values in the next decade).

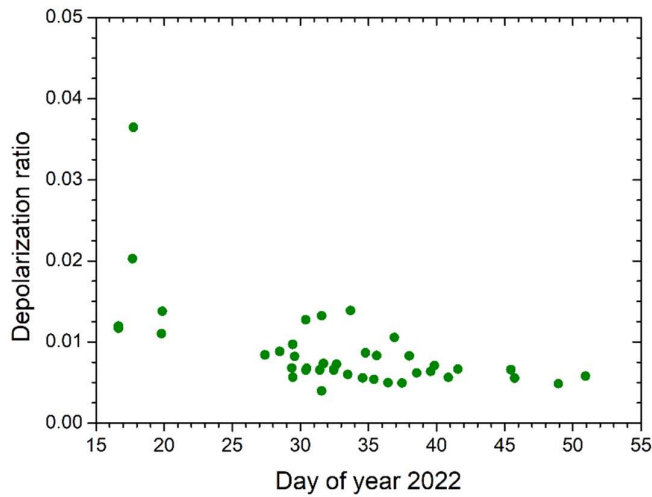

8  
9 **Figure S2.** Particle depolarization ratio of dense aerosol layers from CALIOP the first few weeks after the HT-  
10 22 eruption.
